# Supplementary material
Source: Research Square preprint supplement (doi:10.21203/rs.3.rs-9508703/v1)
Supplement: Supplementary file 1 [file da828b52735d1272438e5523.pdf]

# Supplementary Information

## Quantum-precision-spectroscopy metrology of vacuum Rabi splitting in plasmon-single-emitter strong coupling

Shihao Feng<sup>1,2,7</sup>, Xinyi Fan<sup>1,7</sup>, Qiang Li<sup>3,7</sup>, Wen-Jie Zhou<sup>4,7</sup>, Ting Luo<sup>1</sup>, De-Ke Chen<sup>5</sup>,  
Guanqian Wu<sup>1</sup>, Wan-Ying Li<sup>1</sup>, Jia Wang<sup>1</sup>, Longhui Du<sup>1</sup>, Haowen Zhang<sup>1</sup>, Yanmin  
Kuang<sup>1</sup>, Bo Wang<sup>6</sup>, Wei Li<sup>5,\*</sup>, Lijun Guo<sup>1,\*</sup>, Lin Wu<sup>4,\*</sup>, Renming Liu<sup>1,2,\*</sup>, and Xue-Hua  
Wang<sup>5</sup>

<sup>1</sup>*Henan Key Laboratory of High Efficiency Energy Conversion Science and Technology, Henan International Joint Laboratory of New Energy Materials and Devices, School of Physics and Electronics, Henan University, Kaifeng 475004, China.*

<sup>2</sup>*Institute of Quantum Materials and Physics, Henan Academy of Sciences, Zhengzhou 450046, China.*

<sup>3</sup>*School of Physics, Henan Normal University, Xinxiang 453007, China.*

<sup>4</sup>*Department of Science, Mathematics and Technology, Singapore University of Technology and Design, 8 Somapah Road, Singapore 487372, Republic of Singapore.*

<sup>5</sup>*State Key Laboratory of Optoelectronic Materials and Technologies, School of Physics, Sun Yat-sen University, Guangzhou 510275, China.*

<sup>6</sup>*Future Technology, Henan University, Zhengzhou 450046, China.*

<sup>7</sup>*These authors contributed equally: Shihao Feng, Xinyi Fan, Qiang Li, Wen-Jie Zhou*

**\*Corresponding to:** [liwei373@mail.sysu.edu.cn](mailto:liwei373@mail.sysu.edu.cn); [juneguo@henu.edu.cn](mailto:juneguo@henu.edu.cn); [lin\\_wu@sutd.edu.sg](mailto:lin_wu@sutd.edu.sg); and [liurm@henu.edu.cn](mailto:liurm@henu.edu.cn)

28

## 29 **Contents**

|    |                                                                                           |    |
|----|-------------------------------------------------------------------------------------------|----|
| 30 | <b>Supplementary Note 1: Quantum mechanical model for plasmon-single-emitter strong</b>   |    |
| 31 | <b>coupling</b> .....                                                                     | 2  |
| 32 | <b>Supplementary Note 2: Fabrication and spectral characterization of CB[7]@single MB</b> |    |
| 33 | <b>emitters</b> .....                                                                     | 4  |
| 34 | <b>Supplementary Note 3: Calculation of mode volume from Purcell factor</b> .....         | 5  |
| 35 | <b>Supplementary Note 4: Numerical simulations</b> .....                                  | 6  |
| 36 | <b>Supplementary Note 5: Photobleaching of the strongly coupled Au NDC/CB[7]@single</b>   |    |
| 37 | <b>MB systems</b> .....                                                                   | 6  |
| 38 | <b>Supplementary Note 6: Materials and Methods</b> .....                                  | 7  |
| 39 | <b>Supplementary Note 6.1: Materials</b> .....                                            | 7  |
| 40 | <b>Supplementary Note 6.2: Synthesis of Au nanoparticles</b> .....                        | 7  |
| 41 | <b>Supplementary Figures</b> .....                                                        | 9  |
| 42 | <b>Supplementary Tables</b> .....                                                         | 21 |
| 43 | <b>Supplementary References</b> .....                                                     | 22 |

44

## 45 **Supplementary Note 1: Quantum mechanical model for plasmon-single-emitter** 46 **strong coupling**

47 The strong coupling between a plasmonic nanocavity and a single quantum emitter was  
48 described using a fully quantum mechanical framework. Specifically, the plasmon  
49 mode supported by the nanocavity is represented by bosonic annihilation and creation  
50 operators, while the emitter is modeled as a fermionic two-level system consisting of  
51 ground and excited states. The Hamiltonian of this coupling system can be written as<sup>1,2</sup>

$$52 \quad H = \varepsilon_p p^+ p + \varepsilon_e e^+ e - g[p^+ e + e^+ p] + H_{decay} \quad (S1)$$

53 where  $e(e^+)$  is the annihilation (creation) operator for the quantum emitter with energy  
54 of  $\varepsilon_e$ , and  $p(p^+)$  is the annihilation (creation) operator of the plasmon mode with

55 energy of  $\varepsilon_p$ .  $g$  is the coupling coefficient between the plasmon mode and the emitter,  
 56 which can be calculated using the following Supplementary Eq. (2),

$$57 \quad g = \frac{\varepsilon_e}{\sqrt{2\varepsilon_0\varepsilon_pV_{eff}}} \boldsymbol{\mu}_e \cdot \mathbf{f}_p(\mathbf{r}) , \quad (\text{S2})$$

58 where  $\varepsilon_0$  is the free-space permittivity,  $V_{eff} = n^2 \times V_m$  is the effective mode volume  
 59 of the Au NDC,  $n$  is the refractive index,  $V_m$  is the and mode volume,  $\boldsymbol{\mu}_e$  is the  
 60 transition dipole moment of the quantum emitter,  $\mathbf{f}_p(\mathbf{r}) = \mathbf{E}_p(\mathbf{r})/|\mathbf{E}_p(\mathbf{r})|_{max}$  is the  
 61 normalized electric field (EF) of the plasmon mode at the position of  $\mathbf{r}$ . To account for  
 62 the finite lifetimes of both the plasmon and emitter, the Hamiltonian in Supplementary  
 63 Eq. (1) incorporates inelastic interaction Hamiltonian ( $H_{decay}$ ) between the two  
 64 coupled subsystems and their environment, modeled as a continuum of bosonic modes,

$$67 \quad H_{decay} = \int d\omega \hbar \omega f_p^+(\omega) f_p(\omega) + \int d\omega \hbar \omega f_e^+(\omega) f_e(\omega) \\
 65 \quad - \int d\omega [v_p(\omega) f_p(\omega) p^+ + v_p^*(\omega) f_p^+(\omega) p] \\
 66 \quad - \int d\omega [v_e(\omega) f_e(\omega) e^+ + v_e^*(\omega) f_e^+(\omega) e], \quad (\text{S3})$$

68 where  $f_e(\omega)$  ( $f_e^+(\omega)$ ) is the annihilation (creation) operator of the continuum modes  
 69 that couple to the emitter, and the corresponding coupling strength is  $v_e(\omega)$  ;  
 70  $f_p(\omega)$  ( $f_p^+(\omega)$ ) is the annihilation (creation) operator of the continuum modes that  
 71 couple to the plasmon mode, the corresponding coupling coefficient is  $v_p(\omega)$ .

72 Assuming that only plasmons coupled efficiently to the external photons, the  
 73 absorption spectrum observed from the plasmon channel can be deduced based on  
 74 Zubarev's Green function<sup>3</sup>  $\langle\langle p ; p^+ \rangle\rangle_{\omega+i0^+}$  as,

$$75 \quad \zeta(\omega) \propto -Im \left\{ \langle\langle p ; p^+ \rangle\rangle_{\omega+i0^+} \right\} = -Im \left\{ \hbar\omega - \varepsilon_p + \delta\varepsilon_p + i\frac{\Gamma_p}{2} - \frac{g^2}{\hbar\omega - \varepsilon_e + (\delta\varepsilon_e + i\frac{\Gamma_e}{2})} \right\}^{-1} \quad (\text{S4})$$

76 where  $\delta\varepsilon_p$  ( $\delta\varepsilon_e$ ) and  $\Gamma_p$  ( $\Gamma_e$ ) are the energy shift and the damping linewidth (i.e., full  
 77 width at half maximum, FWHM) of the plasmon mode and the emitter induced by the  
 78 reservoir field, respectively. The energy shifts  $\delta\varepsilon_p$  and  $\delta\varepsilon_e$  can be accounted by  
 79 renormalizing the transition energies  $\varepsilon_p$  and  $\varepsilon_e$ , respectively. Thus,

$$\zeta(\omega) \propto -\text{Im} \frac{(\hbar\omega - \varepsilon_e + i\Gamma_e/2)}{(\hbar\omega - \varepsilon_p + i\Gamma_p/2) \cdot (\hbar\omega - \varepsilon_e + i\Gamma_e/2) - g^2} \quad (\text{S5})$$

81 It should be noted that the scattering spectrum of the strongly coupled system—mainly  
 82 arising from the plasmonic channel and commonly probed in experiments—can also be  
 83 described by Supplementary Eq. (5) when measuring the optical response from the  
 84 same plasmon-channel, provided we ignore differences in intensity<sup>4</sup>. At resonance,  
 85 where  $\varepsilon_p = \varepsilon_e$ , the analytical expression for the spectral splitting (SS) observed in the  
 86 absorption/scattering via the plasmonic channel, denoted as  $\Omega_{\text{SS}}^p$ , can be derived by  
 87 solving  $\frac{d\zeta(\omega)}{d\omega} = 0$ , yielding

$$\Omega_{\text{SS}}^p = 2\sqrt{g(1 + \Gamma_e/\Gamma_p) \cdot (g^2 + \Gamma_e\Gamma_p/4)^{1/2} - (g^2 + \Gamma_e\Gamma_p/4) \cdot \Gamma_e/\Gamma_p}, \quad (\text{S6})$$

89 with the corresponding critical coupling criterion given by,

$$g^2 > \frac{\Gamma_e^2}{8(1 + \Gamma_p/2\Gamma_e)} \quad (\text{S7})$$

## 91 **Supplementary Note 2: Fabrication and spectral characterization of** 92 **CB[7]@single MB emitters**

93 To fabricate a single-molecule emitter, methylene blue (MB) molecules were employed.  
 94 Host-guest chemistry with cucurbit[7]uril(CB[7]) was utilized to prevent dye  
 95 aggregation and ensure isolated emitter formation. In specific, an aqueous CB[7]  
 96 solution (2 mL,  $1.0 \times 10^{-7}$  M) was prepared in a thermostatic water bath at 50 °C. Then,  
 97 1 mL of MB aqueous solution ( $1.0 \times 10^{-7}$  M) was added and thoroughly mixed under  
 98 ultrasonication for 10 min, yielding a molar ratio of MB: CB[7] = 1: 2. This procedure  
 99 resulted in the encapsulation of individual MB molecules within separate CB[7] cavities,  
 100 producing the CB[7]@single MB emitter complex.

101 The integration of a single MB molecule inside the CB[7] can be confirmed by the  
 102 absorption spectroscopy. As illustrated in Supplementary Fig. S5, the absorption of MB  
 103 dimers (indicated by the minor shoulder peak at 612 nm on the black curve) is markedly  
 104 reduced and nearly vanishes upon mixing MB with CB[7] in a 1:2 molar ratio (the blue  
 105 curve in Supplementary Fig. S5). We note that the size of the MB dimer is too large to

106 be encapsulated within a single CB[7] molecule. The absorption spectrum of  
 107 CB[7]@single MB emitters in the mixture was fitted to display the transition energy  
 108 and damping linewidth of single MB emitters, showing a spectral FWHM of about 70  
 109 meV (the dashed green line in Supplementary Fig. S5). Next, we precisely integrate a  
 110 single CB[7]@single MB emitter at the gap center of a gold nanodimer cavity (Au  
 111 NDC), where the electric field (EF) intensity is the maximum (Methods in main text  
 112 and Supplementary Fig. S2d).

### 113 **Supplementary Note 3: Calculation of mode volume ( $V_m$ ) from Purcell factor ( $F_p$ )**

114 Firstly, the standard Purcell factor ( $F_p$ ) calculation looks at the spontaneous emission  
 115 rate of a classical electric dipole at the gap center of the Au NDC. We use the three-  
 116 dimensional finite element method (3D-FEM) to extract this emission rate as well as to  
 117 quantify the cavity  $Q$  factor. A typical simulation of the Au NDC, comprising two 84  
 118 nm Au nanoparticles spaced 0.9 nm apart and positioned on a bulk SiO<sub>2</sub> substrate, yields  
 119 a spectrum for the spontaneous emission rate, as shown in Supplementary Fig. S7. In  
 120 calculations, the CB[7]@single MB emitter embedded in the gap of the Au NDC was  
 121 modeled as a dielectric cylinder (0.75 nm in radius and 0.9 nm in length) with a  
 122 refractive index of 1.4, and the mesh was set at 0.1 nm in the nanogap. Our calculations  
 123 show that the  $F_p$  in the gap center is up to  $F_p \sim 1.42 \times 10^6$  at the resonant wavelength  
 124 of  $\lambda = 660$  nm (Supplementary Fig. S7). Based on this Purcell factor, we can calculate  
 125 the  $Q$  factor of the Au NDC at this resonant wavelength, yielding  $Q = 9.54$ . Since the  
 126 Purcell factor is defined as,

$$127 \quad F_p = \frac{3}{4\pi^2} \frac{Q}{V_m} \left(\frac{\lambda}{n}\right)^3, \quad (S8)$$

128 so we can extract the  $V_m$  at resonant wavelength (660 nm) of  $V_m = 53.5 \text{ nm}^3$ , agreeing  
 129 well with that calculated using the approach based on equation (5) in the Methods  
 130 section of the main text.

131 **Supplementary Note 4: Numerical simulations**

132 The scattering spectra and EF simulations of the Au NDC on both bulk SiO<sub>2</sub> and Si/SiO<sub>2</sub>  
133 photonic substrates were carried out using 3D-FEM. The boundary conditions in these  
134 simulations are consistent with those applied in the  $V_m$  calculations described in the  
135 Methods section of the main text. In simulations, the Au NDCs were fixed on the  
136 surface of the SiO<sub>2</sub> (or Si/SiO<sub>2</sub>) substrates, and each Au NDC was constructed from two  
137 identical Au nanospheres, each with a radius of 42 nm. The gap distance between the  
138 two nanospheres was set at 0.9 nm, which equals the thickness of the CB[7] linker  
139 molecule. The dispersion data for Si and SiO<sub>2</sub> are derived from experimentally  
140 measured refractive indices reported by Aspens & Studna (1983)<sup>5</sup> for Si and Rodríguez-  
141 de Marcos et al. (2016)<sup>6</sup> for SiO<sub>2</sub>, respectively. The permittivity of gold is taken from  
142 experimental measurements performed by Johnson and Christy<sup>7</sup>. To account for the  
143 integration of a single CB[7] molecule into the Au NDC gap in the experimental  
144 configuration, a dielectric cylinder was introduced in the gap region, as described in  
145 Supplementary Note 3. To calculate the scattering spectra, we integrated the power flow  
146 radiating from the surface of the Au NDC and normalized the result to the intensity of  
147 the incident field ( $I_0$ ).

148 **Supplementary Note 5: Photobleaching of the strongly coupled Au**  
149 **NDC/CB[7]@single MB systems**

150 It is established that laser illumination of plasmon-dye-molecule coupled systems  
151 induces photobleaching, even at low intensities and short exposure durations<sup>2,8,9</sup>. In our  
152 study, we employed this effect to destroy exciton states in Au NDC/CB[7]@MB  
153 hybrids using a 633 nm pump laser. The resulting transparency dips in SS were  
154 significantly attenuated or entirely eliminated under a relatively weak irradiance (10  
155  $\mu\text{W}/\mu\text{m}^2$  for 5 min). This bleaching behavior confirms that the observed SS in Fig. 3e  
156 of the main text and Supplementary Fig. S10 arise from strong coupling between MB-  
157 molecule excitons and Au NDCs.

## 158 **Supplementary Note 6: Materials and Methods**

### 159 **Supplementary Note 6.1: Materials**

160 Gold (III) chloride trihydrate ( $\text{HAuCl}_4 \cdot 3\text{H}_2\text{O}$ , >99%), silver nitrate ( $\text{AgNO}_3$ , 99.8%),  
161 sodium citrate ( $\text{C}_6\text{H}_5\text{O}_7\text{Na}_3 \cdot 2\text{H}_2\text{O}$ , 99%), Sodium borohydride ( $\text{NaBH}_4$ , 99%), L-  
162 ascorbic acid ( $\text{C}_6\text{H}_8\text{O}_6$ , >99%), cetyltrimethylammonium bromide (CTAB,  $\geq 99\%$ ),  
163 potassium iodide (KI, 99%), sodium hydroxide ( $\text{NaOH}$ , 99.8%) and sodium chloride  
164 ( $\text{NaCl}$ , 99.5%), Cucurbit[7]urils ( $\text{C}_{42}\text{H}_{42}\text{N}_{28}\text{O}_{14}$ , >99.5%) and methylene blue  
165 ( $\text{C}_{16}\text{H}_{18}\text{ClN}_3\text{S}$ , 95%) were purchased from Sigma Aldrich and used as received. In all  
166 experiments, we used deionized water with a resistivity of  $18.25 \text{ M}\Omega \cdot \text{cm}$ .

### 167 **Supplementary Note 6.2: Synthesis of Au nanoparticles**

168 Highly purified Au nanoparticles were synthesized according to the following  
169 methods<sup>10,11</sup>. In experiments, all glassware was firstly cleaned with aqua regia (3:1 ratio  
170 by volume of  $\text{HCl}$  and  $\text{HNO}_3$ ) and thoroughly rinsed with deionized water.  
171 Subsequently, Au nanocrystal seeds were synthesized by reducing  $\text{HAuCl}_4$  (0.01 M, 2  
172 mL) with freshly prepared ice-cold aqueous  $\text{NaBH}_4$  (0.1 M, 1 mL) in deionized water  
173 (36 mL) under rapid stirring for 1 min. The mixture was aged at  $35 \text{ }^\circ\text{C}$  for 4 h to  
174 hydrolyze any unreacted  $\text{NaBH}_4$ , yielding Au seeds with an average size of  
175 approximately 2 nm. Then, three distinct growth solutions (A, B, and C) were then  
176 prepared for seed-mediated nanoparticle growth. Solutions A and B had identical  
177 compositions, each containing  $\text{NaOH}$  (0.05 mL, 0.1 M), ascorbic acid (0.05 mL, 0.1  
178 M), KI (4.5  $\mu\text{L}$ , 0.1 M), CTAB (9.0 mL, 0.05 M), and  $\text{HAuCl}_4$  (0.25 mL, 10 mM).  
179 Solution C consisted of  $\text{NaOH}$  (0.25 mL, 0.1 M), ascorbic acid (0.25 mL, 0.1 M), KI  
180 (23  $\mu\text{L}$ , 0.1 M), CTAB (45 mL, 0.05 M), and  $\text{HAuCl}_4$  (1.25 mL, 10 mM). All reagents  
181 were added in the specified order. The growth of nanoparticles commenced by gently  
182 adding 0.5 mL of the seed solution to solution A. Following this, 5 mL of growth  
183 solution A was quickly transferred to solution B, with gentle mixing thereafter. Finally,  
184 0.1 mL of solution B was added to growth solution C. Upon this addition, the color of  
185 solution C changed from clear to a deep magenta-purple within 30 min. The initial yield  
186 of spherical Au nanoparticles from this procedure was about 70%. After allowing

187 growth to proceed for 2 h, the final mixture was left undisturbed for 12 h. The  
188 supernatant was then carefully transferred via syringe to a clean beaker, increasing the  
189 purity of the Au nanoparticles to approximately 98%.

190 Subsequently, spherical Au nanoparticles with smooth surfaces were obtained  
191 through regrowth of the as-prepared Au nanoparticles followed by Au<sup>3+</sup> oxidative  
192 etching<sup>12</sup>. The regrowth step was carried out as follows: 1 mL of H<sub>2</sub>AuCl<sub>4</sub> · 3H<sub>2</sub>O  
193 (10 mM) was mixed with 40 mL of cetylpyridinium chloride (10 mM) as the growth  
194 solution. Then, 30 mL of L-ascorbic acid (100 mM) and 5 mL of the as-prepared Au  
195 nanoparticles were added to the growth solution. The mixture was gently stirred in a  
196 26 °C water bath for 30 min. After that, the mixture was centrifuged twice (8000 rpm,  
197 12 min) to remove unreacted ions. The collected precipitate was resuspended in CTAB  
198 solution (50 mM), and its optical density (OD) was adjusted to 1.

199 Au<sup>3+</sup>-mediated oxidative etching step: 16 μL of H<sub>2</sub>AuCl<sub>4</sub> · 3H<sub>2</sub>O (10 mM) was added  
200 to 5 mL of CTAB suspension with an optical density (OD) of 1, and the mixture was  
201 gently stirred in a water bath at 37 °C for 4 hours. Subsequently, the mixture was  
202 centrifuged once at 8000 rpm for 12 minutes. Water was then added, and the mixture  
203 was centrifuged twice at 8000 rpm for 10 minutes to remove unreacted ions, resulting  
204 in smooth spherical Au nanoparticles with an average radius of approximately 42 nm  
205 (Supplementary Fig. S2c). Furthermore, by adjusting the ratio of H<sub>2</sub>AuCl<sub>4</sub> · 3H<sub>2</sub>O to the  
206 as-prepared Au nanoparticles during the regrowth process, as well as varying the  
207 amount of H<sub>2</sub>AuCl<sub>4</sub> · 3H<sub>2</sub>O during the Au<sup>3+</sup>-mediated oxidative etching process, smooth  
208 spherical Au nanoparticles of different sizes can be obtained (Supplementary Fig. S18).

209 **Supplementary Figures**

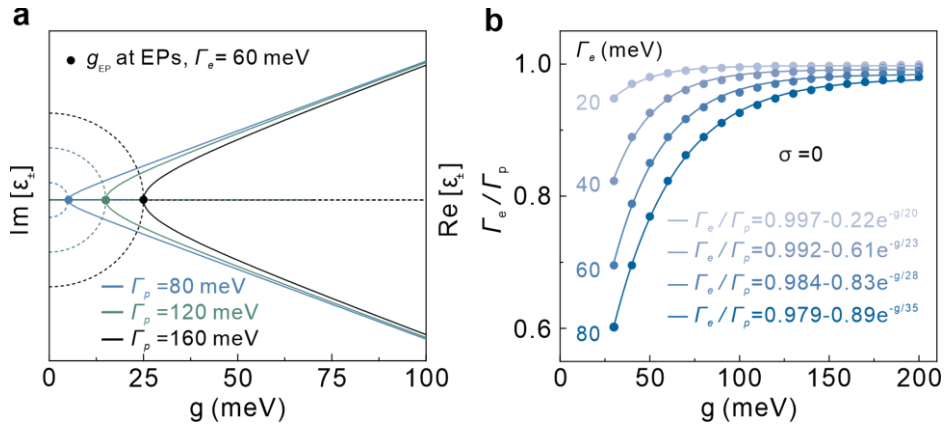

210

211 **Figure S1. (a)** Real (solid curves) and imaginary (dashed curves) parts of the  
 212 eigenenergies as a function of  $g$  at resonance for three cases:  $\Gamma_p = 160$  meV,  $\Gamma_p = 120$   
 213 meV and  $\Gamma_p = 80$  meV. **(b)** Dependence of the damping ratio  $\Gamma_e/\Gamma_p$  on the coupling  
 214 strength  $g$  for different  $\Gamma_e$  values at  $\sigma = 0$ . Solid lines show exponential fits.

215

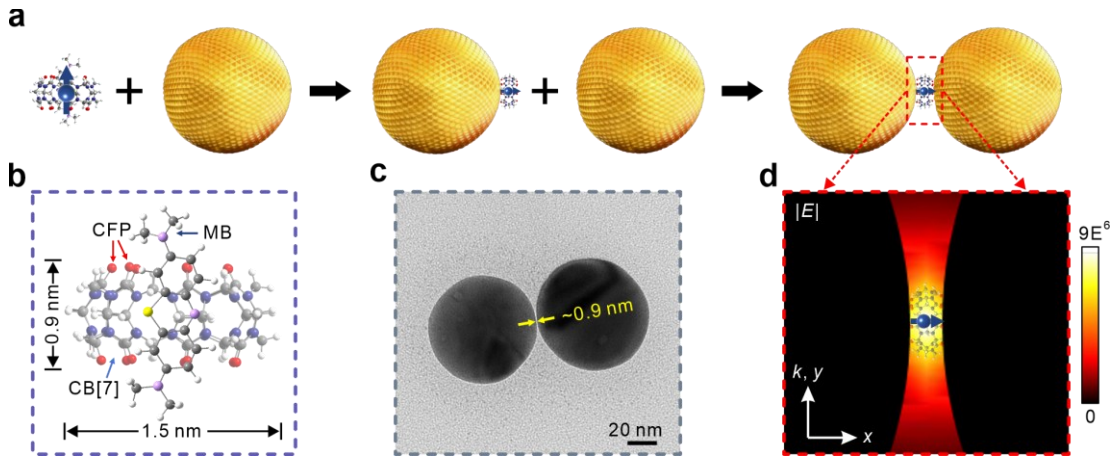

216

217 **Figure S2. Precise positioning and alignment of a single MB molecule in Au NDC.**  
 218 **a**, Process flow to fabricate a hybrid Au NDC containing a single MB molecule with  
 219 deterministic position and dipole alignment. **b**, Schematics of a single MB molecule  
 220 embedded in a CB[7] cage and the single molecule can be integrated in the gap center  
 221 of the Au NDC via the CB[7]. CFP: carbonyl-fringed portals. **c**, Transmission electron  
 222 microscope (TEM) image of an Au NDC/CB[7]@single MB hybrid. **d**, Simulated  
 223 electric field (EF) distributions of the gap plasmon mode confined in the Au NDC with  
 224 a 0.9 nm gap.

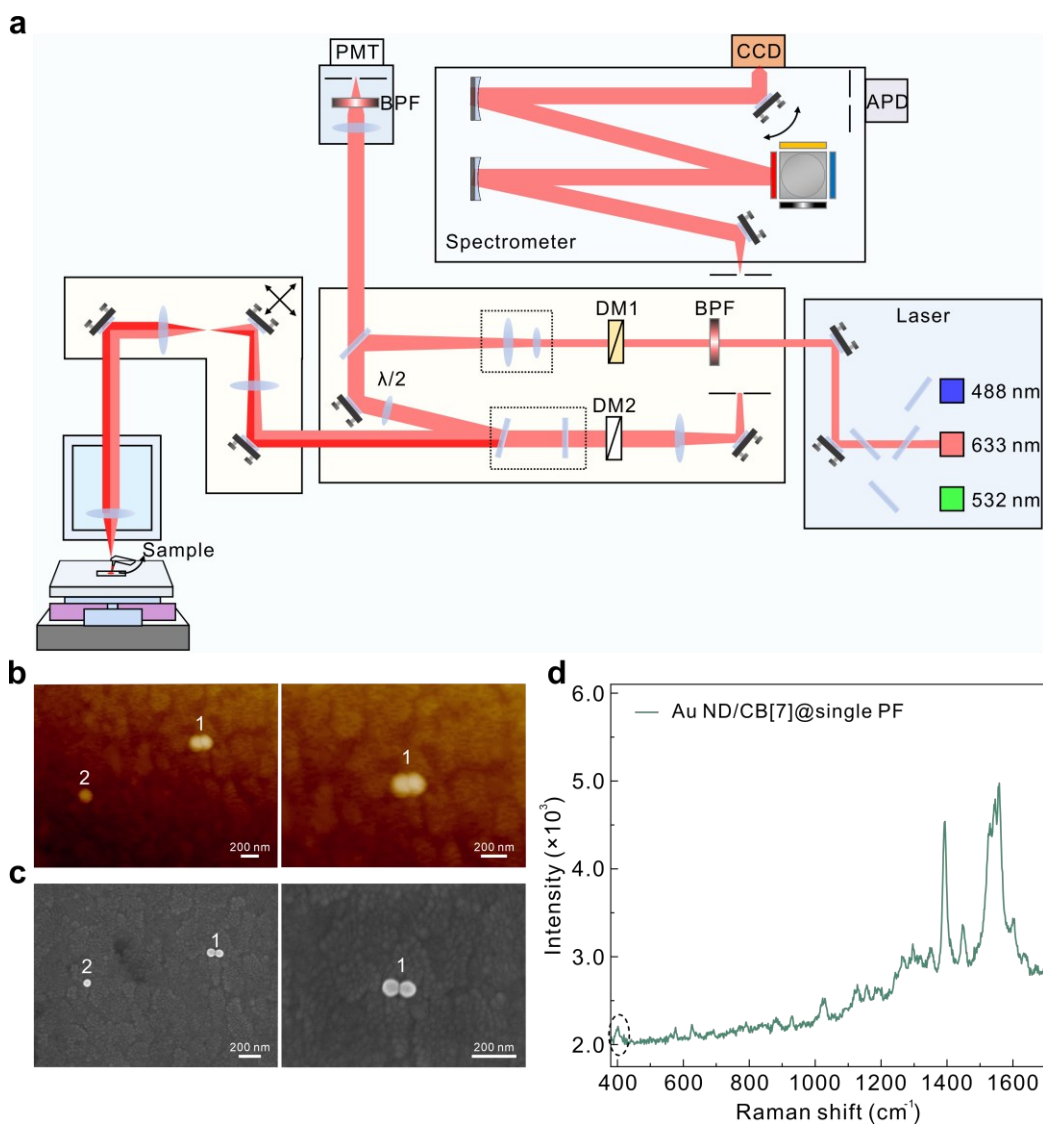

225

226 **Figure S3. SERS measurement for single-molecule events in individual Au NDCs.**

227 **a**, Experimental system configuration for atomic force microscope-Raman (AFM-

228 Raman) combined system. **b**, **c**, AFM images (**b**) and SEM images (**c**) of a measured

229 Au NDC. **d**, SERS spectra obtained from the hybrid Au NDC sample in (**b**) or (**c**).

230

231

232

233

234

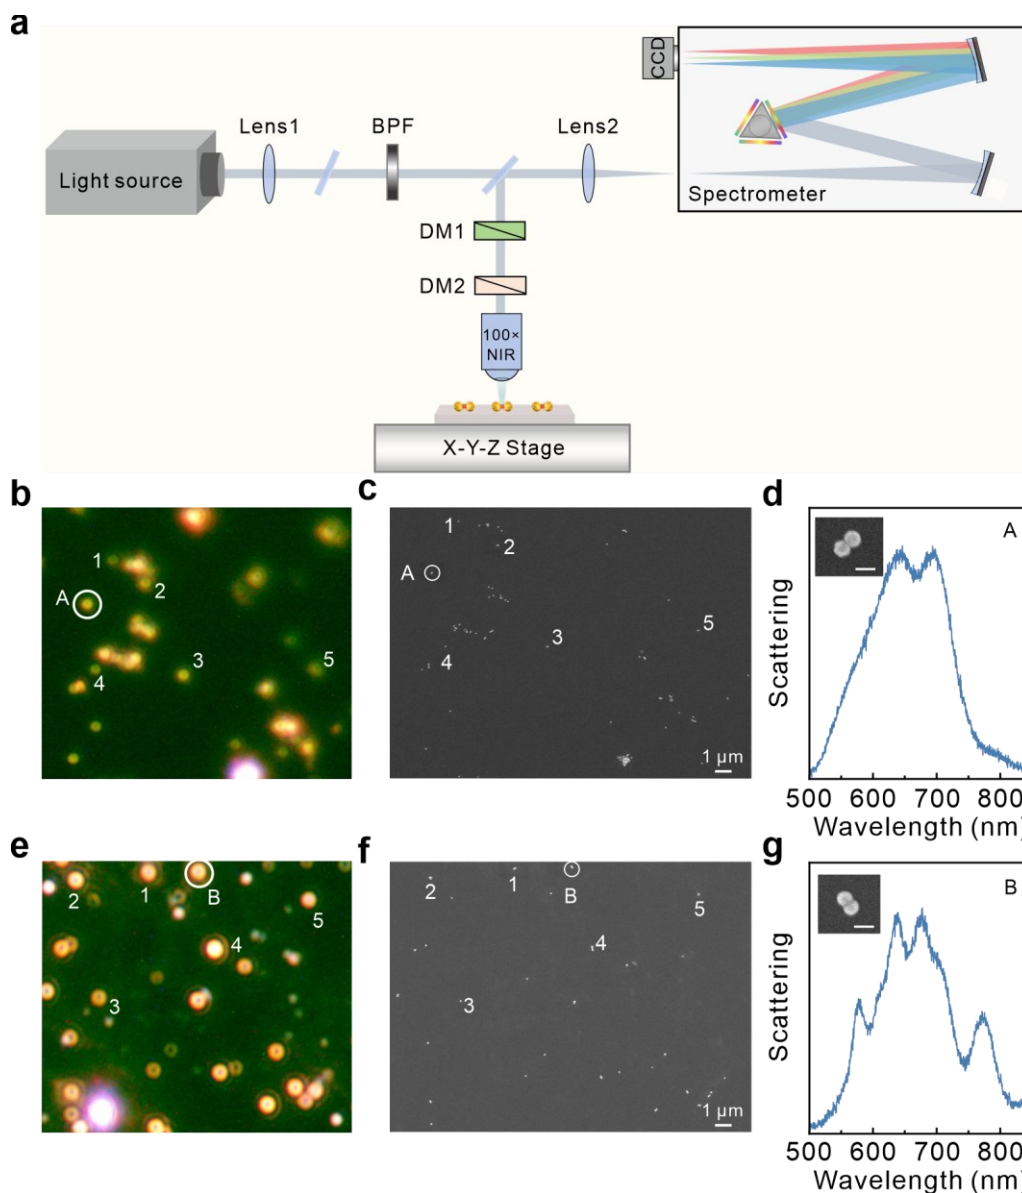

235

236 **Figure S4. Dark-field scattering and corresponding SEM images of the measured**  
 237 **samples on bulk SiO<sub>2</sub> and Si/SiO<sub>2</sub> photonic substrate. a,** Experimental system  
 238 configuration for dark-field scattering measurements. **b,** Dark-field scattering images  
 239 of the measured Au NDC/CB[7]@single MB hybrids on bulk SiO<sub>2</sub> substrate. **c,**  
 240 Corresponding SEM images of the measured samples in **(b)**. **d,** Scattering spectrum and  
 241 corresponding SEM image in a larger magnification (inset) and for the Au  
 242 NDC/CB[7]@single MB hybrids marked in **(b)**. **e,** Dark-field scattering images of the  
 243 measured Au NDC/CB[7]@single MB hybrids on the Si/SiO<sub>2</sub> photonic substrate with  
 244  $t_{\text{SiO}_2} = 2.58 \mu\text{m}$ . **f,** Corresponding SEM images of the measured Au NDC/CB[7]@single  
 245 MB hybrids in **(e)**. **g,** Scattering spectrum and corresponding SEM image in a larger  
 246 magnification (inset) and for the Au NDC/CB[7]@single MB hybrids marked in **(f)**.  
 247 The scale in the inset bar is 100 nm.

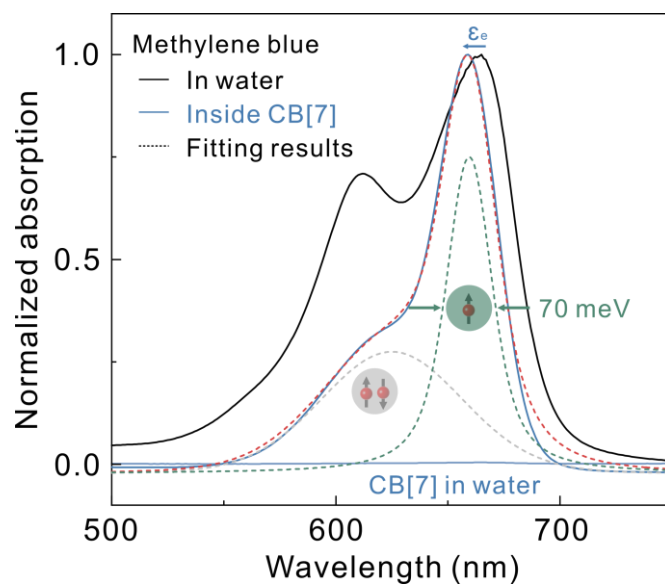

248

249 **Figure S5. Absorption spectra of the MB molecules in aqueous solutions with and**  
 250 **without CB[7].** Black line: Normalized absorption spectrum of the MB molecules in  
 251 aqueous solutions without CB[7]. Blue line: Normalized absorption spectrum of MB  
 252 molecules in water with CB[7]. The dashed lines are Lorentz fitted results, showcasing  
 253 the MB monomer in CB[7] and dimer, respectively. The molar ratio of MB and CB[7]  
 254 is 1 : 2.

255

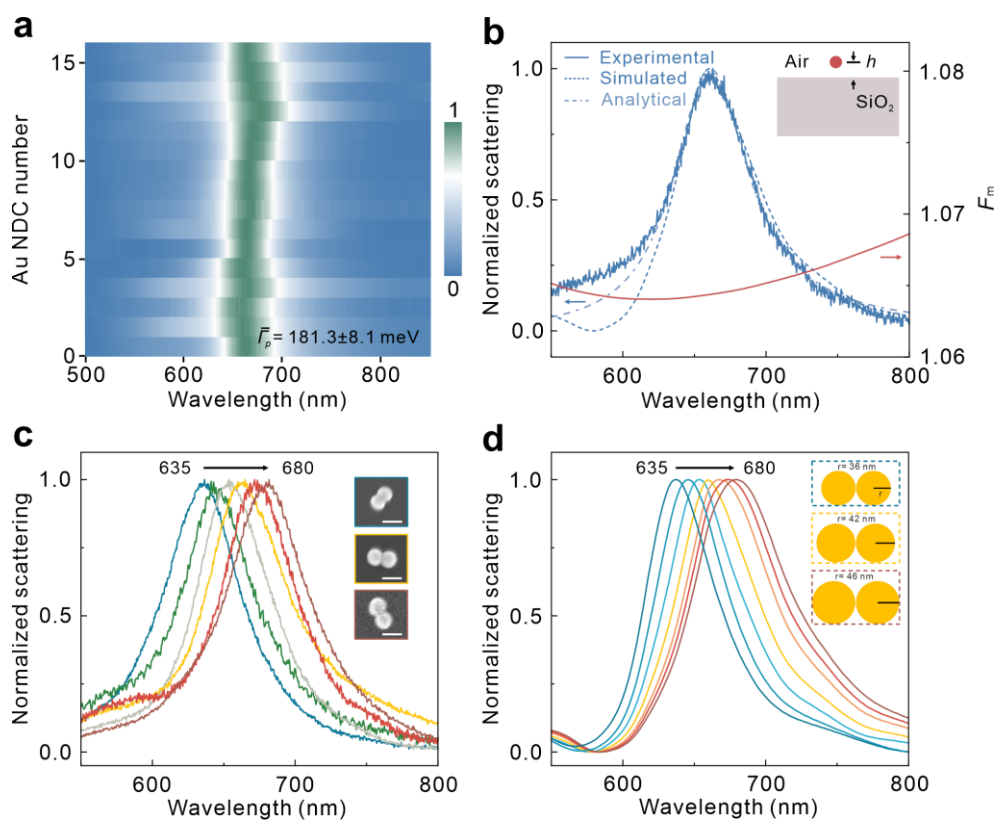

256

257 **Figure S6. Experimental and simulated scattering spectra of the bare Au NDCs**  
 258 **with different particle sizes. a,** Representative scattering spectra of the individual bare  
 259 Au NDCs on the bulk SiO<sub>2</sub> substrate. The mean value of  $\bar{I}_p = 181.3 \pm 8.1$  meV can be  
 260 obtained for the resonance wavelength at  $\sim 660$ - $670$  nm. **b,** Normalized scattering  
 261 spectra of an Au NDC on the bulk SiO<sub>2</sub> substrate (solid blue line), the simulated result  
 262 (dashed blue), and the analytical result (dot-dashed pale blue) calculated using Eq. (4)  
 263 in the main text, with  $F_m(\mathbf{r}, \omega, \hat{\boldsymbol{\mu}}_p) = C$ . Red line: the  $F_m$  spectrum simulated at  $h = 42$   
 264 nm above the bulk SiO<sub>2</sub> substrate. There are no OPs, we set  $F_m(\mathbf{r}, \omega, \hat{\boldsymbol{\mu}}_p)$  as a constant  
 265 ( $C$ ). **c,** Normalized scattering spectra of individual bare Au NDCs with different particle  
 266 sizes located on bulk SiO<sub>2</sub> substrate, showcasing the plasmon resonance wavelength  
 267 varying from 635 to 680 nm. The insets give the SEM images of the measured samples  
 268 related to the scattering spectra with the same line color as the box around the SEM  
 269 images. The scale bar is 100 nm. **d,** Normalized scattering spectra of the bare Au NDCs  
 270 with different sizes and a fixed gap distance of  $d = 0.9$  nm, located on the bulk SiO<sub>2</sub>  
 271 substrate. These spectra are simulated using the 3D-FEM (Supplementary Note 4).

272

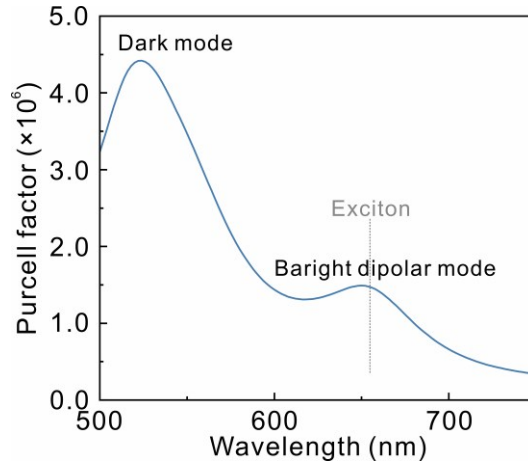

273

274 **Figure S7. Purcell factor of the Au NDC with a gap distance of 0.9 nm.** Purcell  
 275 factor simulation of the Au NDC constructed by a single CB[7] molecule ( $d = 0.9$  nm),  
 276 with a classical electric dipole placed in the center of the gap at the position of  
 277 maximum field and spontaneous emission rate plotted as a function of wavelength  
 278 (Supplementary Note 3).

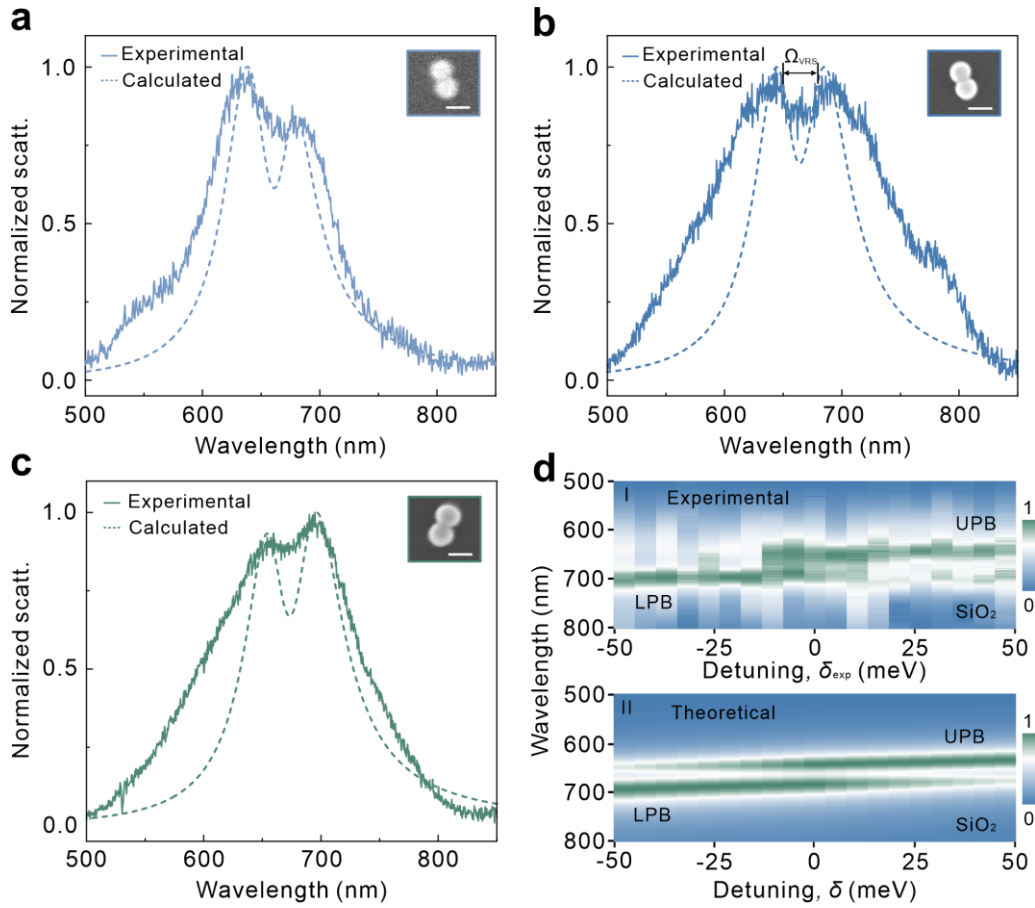

279

280 **Figure S8. Single-exciton strong coupling in individual Au NDC/CB[7]@single**  
 281 **MB hybrids with different detuning on bulk SiO<sub>2</sub>.** a-c, Scattering spectra of three  
 282 individual Au NDC/CB[7]@single MB hybrids with different experimental detuning  
 283 (a)  $\delta_{exp} > 0$ , (b)  $\delta_{exp} = 0$ , and (c)  $\delta_{exp} < 0$ . The dashed curves show the theoretical  
 284 spectra of these strongly coupled systems calculated using Eq. (5) in the main text. The  
 285 insets show SEM images of the corresponding measured samples. The scale bar is 100  
 286 nm. d, (I) Normalized scattering spectra of the individual Au NDC/CB[7]@single MB  
 287 hybrids ordered according to the experimental detuning ( $\delta_{exp} = \varepsilon_+ + \varepsilon_- - 2\varepsilon_e$ ). (II):  
 288 Normalized scattering spectra calculated using Eq. (5) in the main text, arranged by the  
 289 size of the theoretical detuning ( $\delta = \varepsilon_p - \varepsilon_e$ ).

290

291

292

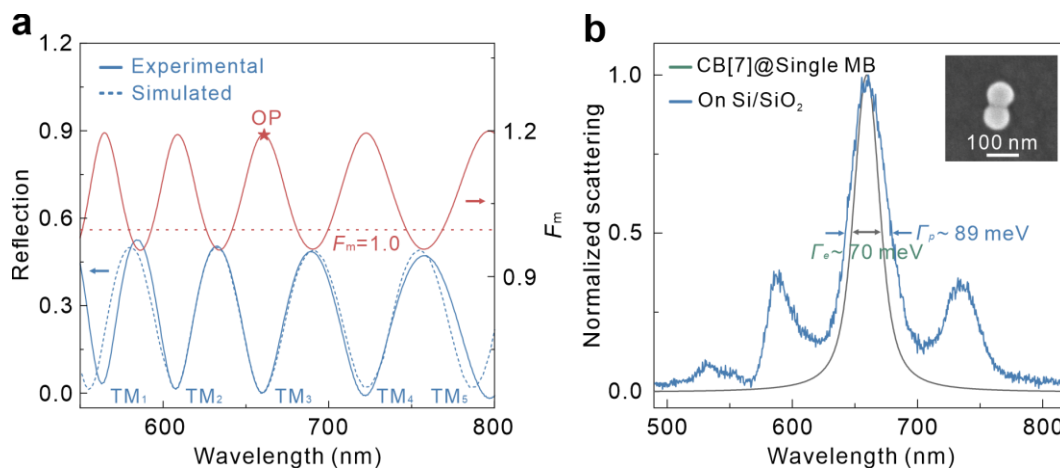

293

294 **Figure S9. Plasmonic damping linewidth suppression through Si/SiO<sub>2</sub> photonic**  
 295 **substrate with  $t_{\text{SiO}_2} = 2.58 \mu\text{m}$ .** **a**, Measured (solid blue line) and simulated (dashed  
 296 **blue line) reflectance of the bare Si/SiO<sub>2</sub> photonic substrate with  $t_{\text{SiO}_2} = 2.58 \mu\text{m}$ . The**  
 297 **solid red line is the  $F_m$  spectrum simulated at  $h = 42 \text{ nm}$  above the substrate, **b**,**  
 298 **Normalized scattering spectrum of bare Au NDC on the Si/SiO<sub>2</sub> photonic substrate with**  
 299  **$t_{\text{SiO}_2} = 2.58 \mu\text{m}$ , respectively. The gray line represents the fitted absorption spectrum of**  
 300 **the CB[7]@single MB in water (Supplementary Fig. 5).**

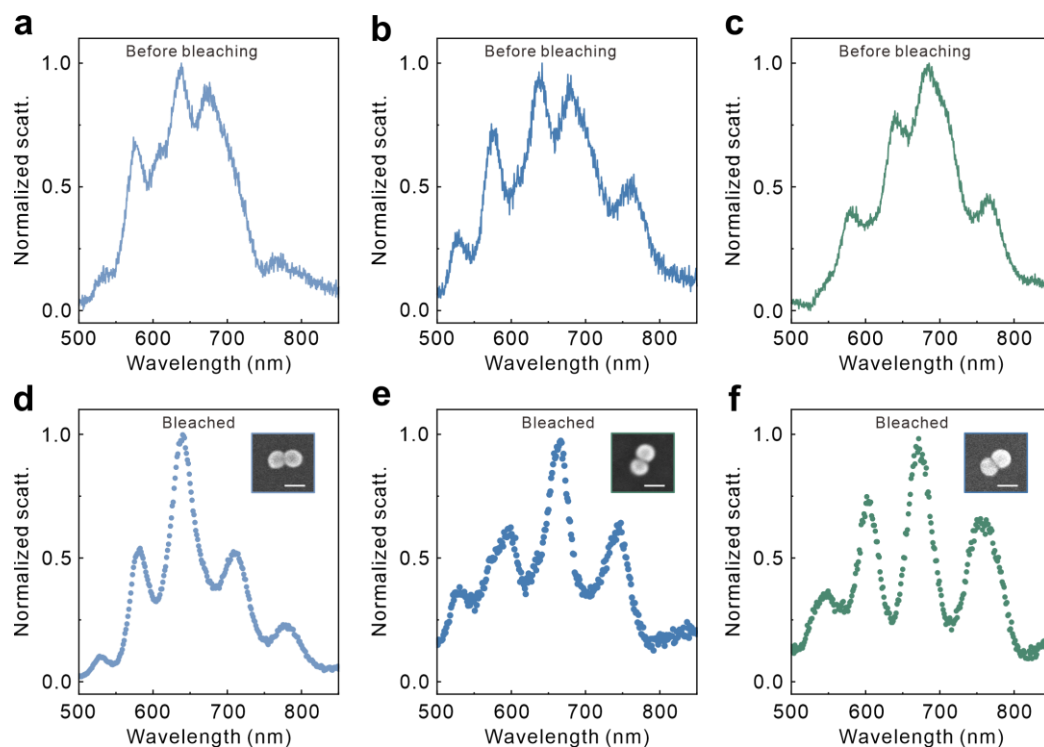

301

302 **Figure S10. Photobleaching of the strongly coupled Au NDC/CB[7]@single MB**  
 303 **hybrids.** **a-c**, Normalized scattering spectra of individual Au NDC/CB[7]@single MB  
 304 **hybrids on Si/SiO<sub>2</sub> substrate ( $t_{\text{SiO}_2} = 2.58 \mu\text{m}$ ).** **d-f**, Normalized scattering spectra of the  
 305 **samples in (a-c) after photobleaching induced by laser illumination. The insets are SEM**

306 images of the measured hybrid Au NDCs. The scale bar is 100 nm.

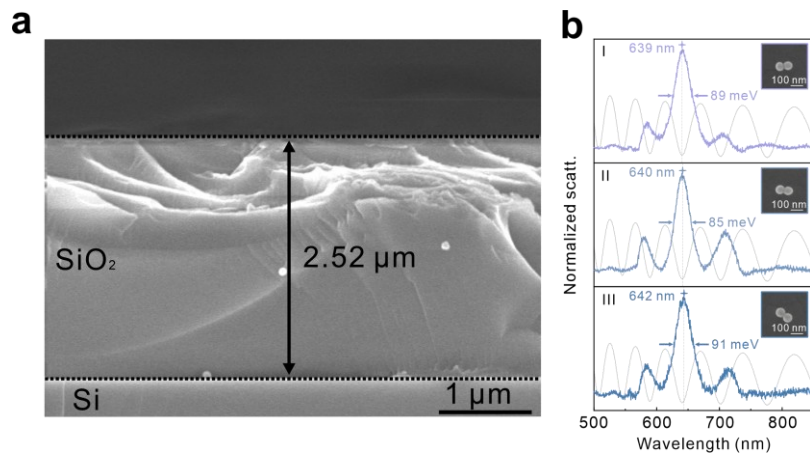

307

308 **Figure S11. Normalized scattering spectra for three Au NDCs on a Si/SiO<sub>2</sub>**  
309 **photonic substrate with  $t_{\text{SiO}_2} = 2.52 \mu\text{m}$ .** **a**, Side-view SEM image of the Si/SiO<sub>2</sub>  
310 photonic substrate with  $t_{\text{SiO}_2} = 2.52 \mu\text{m}$ . **b**, Normalized scattering spectra for three  
311 individual Au NDCs located on this Si/SiO<sub>2</sub> substrate. The dashed grey curves represent  
312 the experimental reflectance of the bare Si/SiO<sub>2</sub> substrate. The insets are corresponding  
313 SEM images for the measured Au NDCs, and the scale bar is 100 nm.

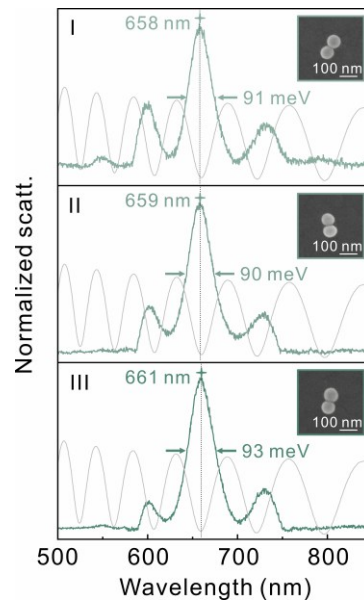

314

315 **Figure S12. Normalized scattering spectra for three individual Au NDCs on a**  
316 **Si/SiO<sub>2</sub> photonic substrate with  $t_{\text{SiO}_2} = 2.58 \mu\text{m}$ .** The side-view SEM image of this  
317 substrate can be seen in Fig. 3b of the main text. The dashed grey curves represent the  
318 experimental reflectance of the bare Si/SiO<sub>2</sub> substrate. The insets are corresponding  
319 SEM images for the measured Au NDC, and the scale bar is 100 nm.

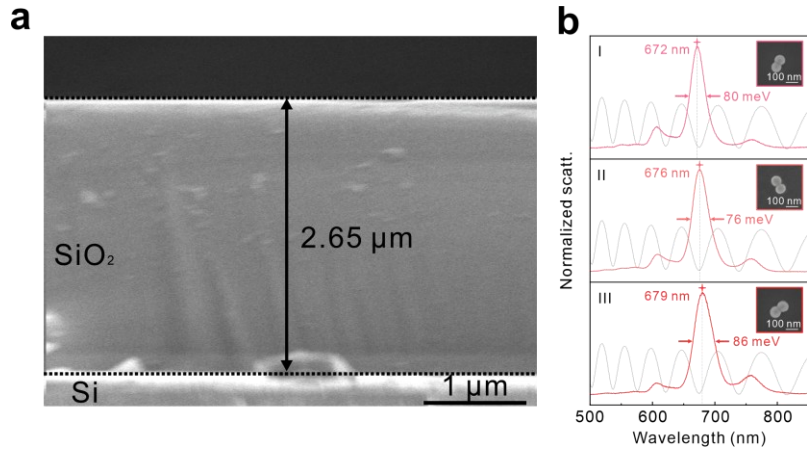

320

321 **Figure S13. Normalized scattering spectra for three individual Au NDCs on a**  
 322 **Si/SiO<sub>2</sub> photonic substrate with  $t_{\text{SiO}_2} = 2.65 \mu\text{m}$ .** **a**, Side-view SEM image of the  
 323 Si/SiO<sub>2</sub> photonic substrate with  $t_{\text{SiO}_2} = 2.65 \mu\text{m}$ . **b**, Normalized scattering spectra for  
 324 three different Au NDCs located on the same Si/SiO<sub>2</sub> substrate. The dashed grey curves  
 325 represent the experimental reflectance of the bare Si/SiO<sub>2</sub> substrate. The insets are  
 326 corresponding SEM images for the measured Au NDCs, and the scale bar is 100 nm.

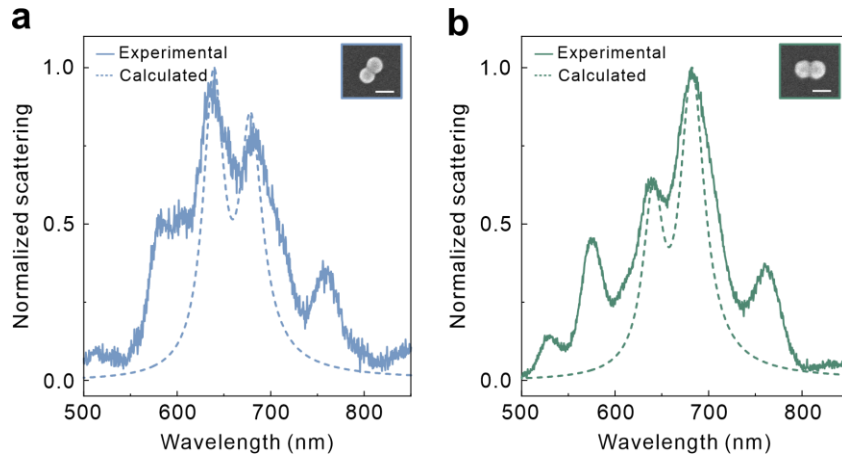

327

328 **Figure S14. Au NDC/CB[7]@single MB hybrids with different detuning on the**  
 329 **Si/SiO<sub>2</sub> photonic substrate with  $t_{\text{SiO}_2}$  of about  $2.58 \mu\text{m}$ .** **a**, **b**, Normalized scattering  
 330 spectra of Au NDC/CB[7]@single MB hybrids with different experimental detuning **(a)**  
 331  $\delta_{exp} > 0$  and **(b)**  $\delta_{exp} < 0$ . The dashed curves are theoretical results calculated using  
 332 Eq. (5) in the main text. The insets show SEM images of the corresponding measured  
 333 samples, and the scale bar is 100 nm.

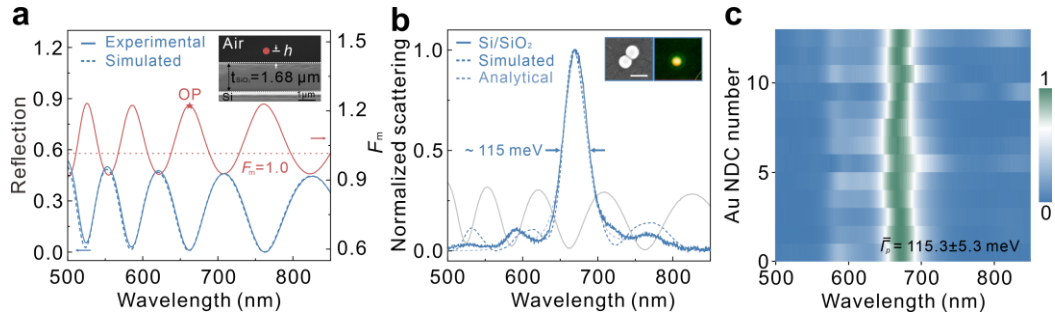

334

335 **Figure S15. Plasmonic damping linewidth suppression through Si/SiO<sub>2</sub> photonic**  
 336 **substrate with  $t_{\text{SiO}_2} = 1.68 \mu\text{m}$ .** **a**, Measured (solid blue line) and simulated (dashed  
 337 **blue line) reflectance of the bare Si/SiO<sub>2</sub> photonic substrate with  $t_{\text{SiO}_2} = 1.68 \mu\text{m}$ . The**  
 338 **solid red line is the  $F_m$  spectrum simulated at  $h = 42 \text{ nm}$  above the substrate. The inset**  
 339 **is the side-view SEM image of this substrate. **b**, Normalized scattering spectra of an Au**  
 340 **NDC on the photonic substrate (solid blue line), the simulated result (dashed blue), the**  
 341 **analytical result (dot-dashed pale blue) calculated using Eq. (4), and measured**  
 342 **reflectance of the bare photonic substrate (solid gray). Insets: SEM image (left) and**  
 343 **dark-field image (right) of the measured Au NDCs, respectively. The scale bar is 100**  
 344 **nm. **c**, Scattering spectra of the individual Au NDCs with the resonance wavelength at**  
 345 **660-670 nm measured on this photonic substrate. The mean value of  $\bar{\Gamma}_p = 115.3 \pm 5.3$**   
 346 **meV can be obtained.**

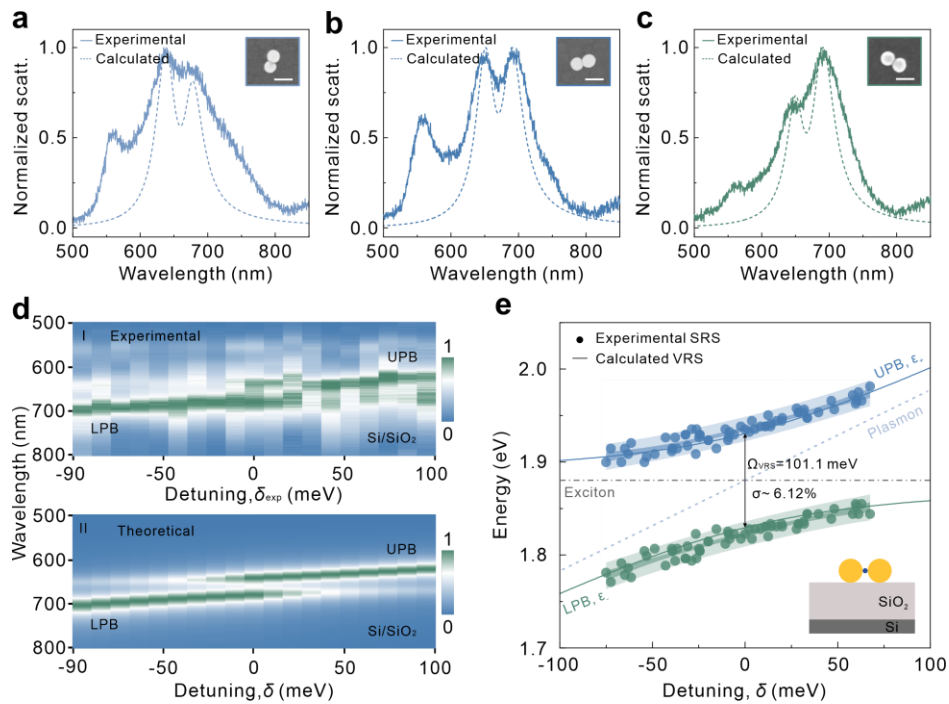

347

348 **Figure S16. Single-exciton strong coupling in individual Au NDC/CB[7]@single**  
 349 **MB hybrids on Si/SiO<sub>2</sub> substrate with  $t_{\text{SiO}_2}$  of about  $1.68 \mu\text{m}$ .** **a-c**, Normalized

350 scattering spectra of three individual Au NDC/CB[7]@single MB hybrids with  
 351 different experimental detunings of (a)  $\delta_{exp} > 0$ , (b)  $\delta_{exp} = 0$ , and (c)  $\delta_{exp} < 0$ . The  
 352 dashed curves show the theoretical spectra of the strongly coupled systems calculated  
 353 using Eq. (5) in the main text. The insets show SEM images of the corresponding  
 354 measured samples. The scale bar is 100 nm. **d**, (I) Normalized scattering spectra of  
 355 individual Au NDC/CB[7]@single MB hybrids measured on the Si/SiO<sub>2</sub> substrates  
 356 with  $t_{SiO_2}$  of about 1.68  $\mu\text{m}$ , ordered according to the experimental detuning  $\delta_{exp}$ . (II)  
 357 Normalized scattering spectra calculated using Supplementary Eq. (5), arranged by the  
 358 size of the theoretical detuning ( $\delta$ ). **e**, Energy dispersions of the mixed states extracted  
 359 from individual Au NDC/CB[7]@single MB hybrids measured on the Si/SiO<sub>2</sub> photonic  
 360 substrate with  $t_{SiO_2}$  of about 1.68  $\mu\text{m}$ . The solid lines are theoretical energy dispersions  
 361 calculated using Eq. (2). The dark shaded area represents the 95% confidence interval.

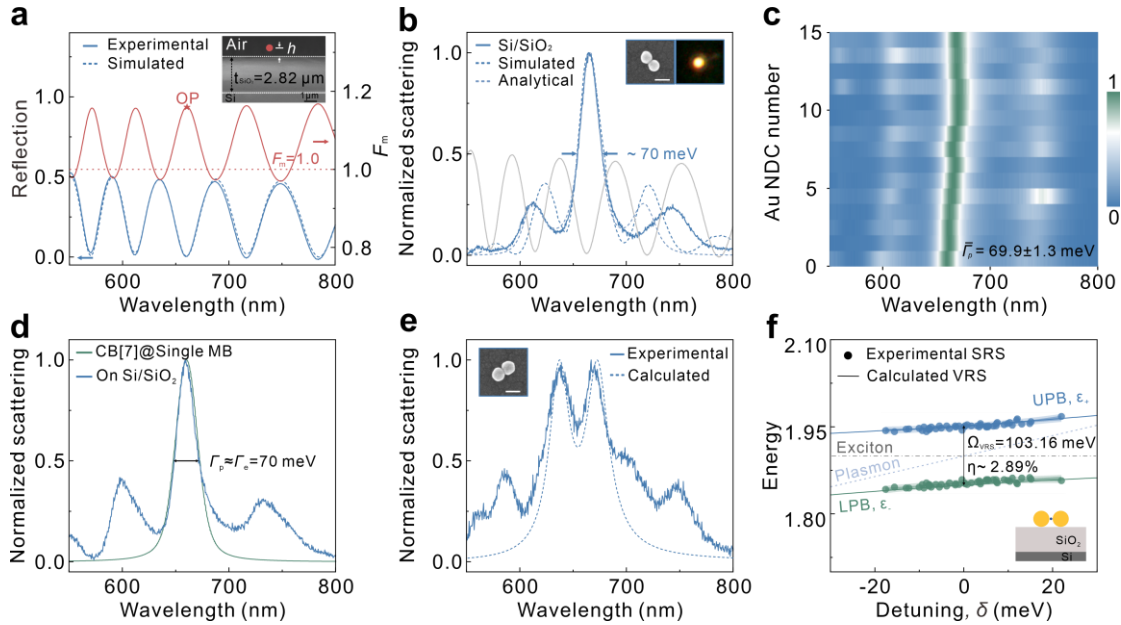

362

363 **Figure S17 Plasmonic damping linewidth suppression through Si/SiO<sub>2</sub> photonic**  
 364 **substrate with  $t_{SiO_2} = 2.82 \mu\text{m}$ .** **a**, Measured (solid blue line) and simulated (dashed

365 blue line) reflectance of the bare Si/SiO<sub>2</sub> photonic substrate with  $t_{SiO_2} = 1.68 \mu\text{m}$ . The

366 solid red line is the  $F_m$  spectrum simulated at  $h = 42 \text{ nm}$  above the substrate. The inset

367 is the side-view SEM image of this substrate. **b**, Normalized scattering spectra of an Au

368 NDC on the photonic substrate (solid blue line), the simulated result (dashed blue), the

369 analytical result (dot-dashed pale blue) calculated using Eq. (4), and measured

370 reflectance of the bare photonic substrate (solid gray). Insets: SEM image (left) and

371 dark-field image (right) of the measured Au NDCs, respectively. The scale bar is 100

372 nm. **c**, Scattering spectra of the individual Au NDCs with the resonance wavelength at

373 660-670 nm measured on this photonic substrate. The mean value of  $\bar{\lambda}_p = 69.9 \pm 1.3$

374 meV can be obtained. **d**, Normalized scattering spectrum of bare Au NDC on the  
 375 Si/SiO<sub>2</sub> photonic substrate with  $t_{\text{SiO}_2} = 2.82 \mu\text{m}$ , respectively. The gray line represents  
 376 the fitted absorption spectrum of the CB[7]@single MB in water (Supplementary Fig.  
 377 5). **e**, Normalized scattering spectra of an Au NDC/CB[7]@single MB hybrid on  
 378 Si/SiO<sub>2</sub> photonic substrate. The dashed curve is the theoretical prediction calculated  
 379 using Eq. (5). **f**, Energy dispersions of the mixed states extracted from individual Au  
 380 NDC/CB[7]@single MB hybrids measured on the Si/SiO<sub>2</sub> photonic substrate with  
 381  $t_{\text{SiO}_2}$  of about  $2.82 \mu\text{m}$ . The solid lines are theoretical energy dispersions calculated  
 382 using Eq. (2). The dark shaded area represents the 95% confidence interval.

383

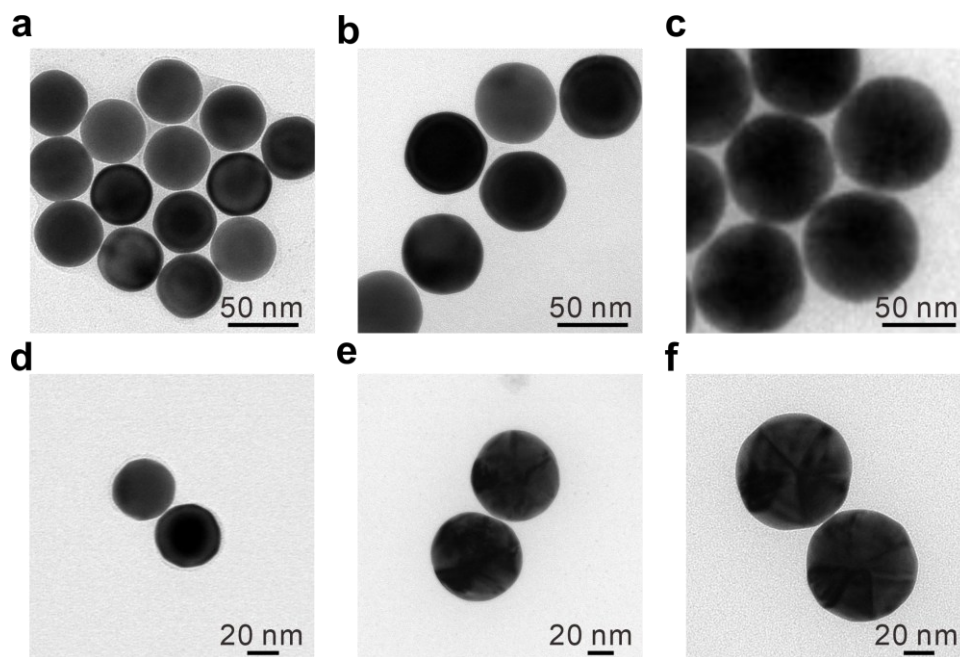

384

385 **Figure S18 Morphology characterization of Au nanoparticles with different sizes.**  
 386 **a-c** TEM images of the spherical Au nanoparticles with different radii of **(a)**  $22.6 \pm$   
 387  $1.3\text{nm}$ , **(b)**  $30.1 \pm 2.2 \text{ nm}$ , and **(c)**  $40.4 \pm 2.6 \text{ nm}$ . **d-e** TEM images of Au NDCs  
 388 prepared using the Au nanoparticles with a radius of  $\sim 20 \text{ nm}$ ,  $30 \text{ nm}$ , and  $40 \text{ nm}$ .  
 389

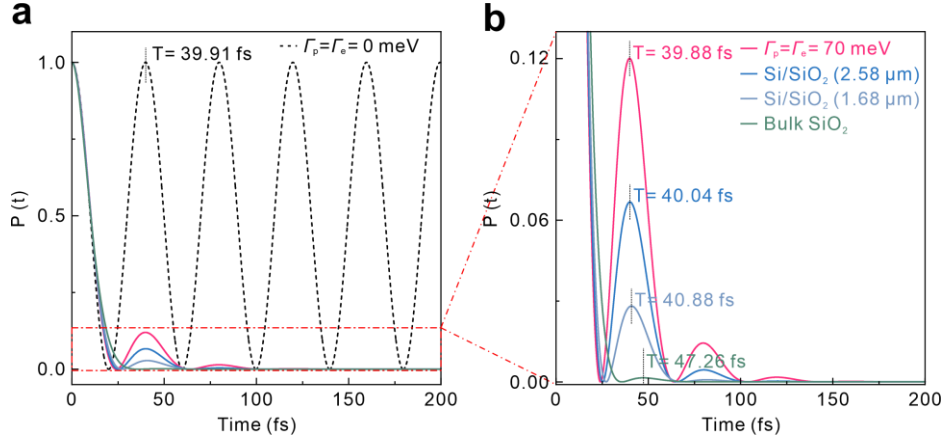

390

391 **Figure S19. Vacuum Rabi oscillations calculated in Au NDC/CB[7]@single MB**  
 392 **hybrids positioned on bulk SiO<sub>2</sub> and Si/SiO<sub>2</sub> photonic substrates with different**  
 393  **$t_{\text{SiO}_2}$ .** **a**, Calculated upper-state dynamic evolutions of the initially excited emitter in  
 394 the lossy Au NDCs, with varying  $\Gamma_p$ , correspond to the cases illustrated in Fig. 4b of  
 395 the main text. The other parameters are same as those used in Fig. 4c in the main text.  
 396 The dashed line is calculated for the ideal case of  $\Gamma_p = \Gamma_e = 0$ , and the red line is  
 397 calculated at  $\Gamma_p = \Gamma_e = 70$  meV. **b**, Enlarged view of the area within the dashed box  
 398 in (a). The dashed line is not given.

### 399 Supplementary Tables

400 **Table S1.** Calculated  $V_{\text{eff}}$  and other parameters for the Au NDCs on different substrates.

| Substrate                                                      | $\lambda$<br>(nm) | $\Gamma_p$<br>(nm) | $V_{\text{eff}}$<br>(nm <sup>3</sup> ) | $V_{EP}$<br>(meV) | $g$<br>(meV) | $\Omega_{VRS}$<br>(meV) |
|----------------------------------------------------------------|-------------------|--------------------|----------------------------------------|-------------------|--------------|-------------------------|
| bulk SiO <sub>2</sub>                                          | 660               | 181                | 52.5                                   | 27.75             | 51.82        | 87.5                    |
| Si/SiO <sub>2</sub><br>( $t_{\text{SiO}_2}=1.68 \mu\text{m}$ ) | 661               | 115                | 51.4                                   | 11.25             | 51.83        | 101.1                   |
| Si/SiO <sub>2</sub><br>( $t_{\text{SiO}_2}=2.58 \mu\text{m}$ ) | 661               | 89                 | 51.3                                   | 4.75              | 51.87        | 103.2                   |
| Si/SiO <sub>2</sub><br>( $t_{\text{SiO}_2}=2.82 \mu\text{m}$ ) | 662               | 70                 | 51.3                                   | 0                 | 51.82        | 103.6                   |

401 Note that, since the Au NDC has a  $\sim 0.9$ -nm gap, the plasmonic electric field  $\mathbf{E}_p(\mathbf{r}, \omega)$  and the  
 402 corresponding energy density are predominantly distributed in the nanogap between the

403 nanoparticles. Thus, the permittivity ( $\epsilon(\mathbf{r}, \omega)$ ) is still dominated by the that in the nanogap in the  
404 nanodimer, where  $\epsilon(\mathbf{r}, \omega) = 1.0$  for air. Therefore,  $V_{\text{eff}} = V_{\text{m}} \times \epsilon(\mathbf{r}) \approx V_{\text{m}}^{13}$  was used in our  $V_{\text{eff}}$   
405 calculations.

## 406 **Supplementary References**

- 407 1. Manjavacas, A., García de Abajo, F. J. & Nordlander, P. Quantum plexcitonics:  
408 strongly interacting plasmons and excitons, *Nano Lett.* **11**, 2318–2323 (2011).
- 409 2. Liu, R. et al. Strong light-matter interactions in single open plasmonic nanocavities  
410 at the quantum optics limit. *Phys. Rev. Lett.* **118**, 237401 (2017).
- 411 3. Zubarev, D. N. Double-time Green functions in statistical physics. *Sov. Phys. Usp.* **3**,  
412 320 (1960).
- 413 4. Du, R. et al. How to obtain the correct Rabi splitting in a subwavelength interacting  
414 system. *Nano Lett.* **23**, 444–450 (2023).
- 415 5. Aspnes, D. E. & Studna, A. A. Dielectric functions and optical parameters of si, ge,  
416 gap, gaas, gasb, inp, inas, and insb from 1.5 to 6.0 eV. *Phys. Rev. B* **27**, 985 (1983).
- 417 6. Rodríguez-de Marcos, L. V., Larruquert, J. I., Méndez, J. A., et al. Self-consistent  
418 optical constants of SiO<sub>2</sub> and Ta<sub>2</sub>O<sub>5</sub> films. *Opt. Mater. Express* **6**, 3622–3637 (2016).
- 419 7. Johnson, P. B. & Christy, R.W. Optical constants of the noble metals. *Phys. Rev. B*  
420 **6**, 4370 (1972).
- 421 8. Chikkaraddy, R. et al. Single-molecule strong coupling at room temperature in  
422 plasmonic nanocavities. *Nature* **535**, 127–130 (2016).
- 423 9. Heintz, J. et al. Few-molecule strong coupling with dimers of plasmonic  
424 nanoparticles assembled on DNA. *ACS Nano* **15**, 14732–14743 (2021).
- 425 10. Liu, R. et al. On-demand shape and size purification of nanoparticle based on  
426 surface area. *Nanoscale* **6**, 13145–13153 (2014).
- 427 11. Millstone, J. E. et al. Iodide ions control seed-mediated growth of anisotropic gold  
428 nanoparticles. *Nano Lett.* **8**, 2656–2659 (2008).
- 429 12. O'Brien, M. N. et al. Uniform circular disks with synthetically tailorable diameters:  
430 Two dimensional nanoparticles for plasmonics. *Nano Lett.* **15**, 1012–1017 (2015).
- 431 13. Wang, X. H., Wang, R., Gu, B. Y. & Yang, G. Z. Decay distribution of spontaneous

- 432 emission from an assembly of atoms in photonic crystals with pseudogaps. *Phys. Rev.*  
433 *Lett.* **88**, 093902 (2002).
